# Supplementary material
Source: publisher site journal article supplement (https://www.dovepress.com/article/388049)
Supplement: Supplementary file 1 [file get_supplementary_file.php]

## Appendix

| Variable                                          | P-value (Pre) | P-value (Post) | Normal? |
|---------------------------------------------------|---------------|----------------|---------|
| Hospitalizations (All-Cause)                      | <.001         | <.001          | No      |
| Hospitalizations (All-Cause) Length of Stay       | <.001         | .004           | No      |
| Hospitalizations (Cardiopulmonary)                | <.001         | <.001          | No      |
| Hospitalizations (Cardiopulmonary) Length of Stay | <.001         | .004           | No      |
| Emergency Room Visits (All Cause)                 | <.001         | <.001          | No      |
| Emergency Room Visits (Cardiopulmonary)           | <.001         | <.001          | No      |
| Pulmonologist Office Visits                       | <.001         | .005           | No      |
| Steroids Prescribed Per Patient                   | <.001         | <.001          | No      |
| Steroids Prescribed Per Office Visit              | <.001         | <.001          | No      |

**Appendix A:** Results of normality testing using the Kolmogorov-Smirnov test for each of the endpoint parameters.
